# Supplementary material
Source: Springer Nature journal article supplement (https://www.springermedizin.de/resource/supplementary/12877_2013_908_MOESM1_ESM.pdf/9440654)

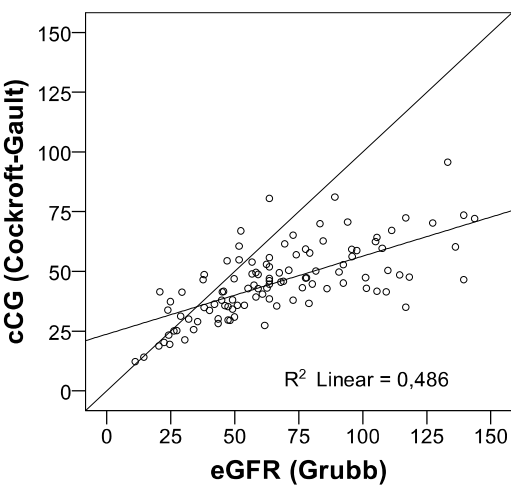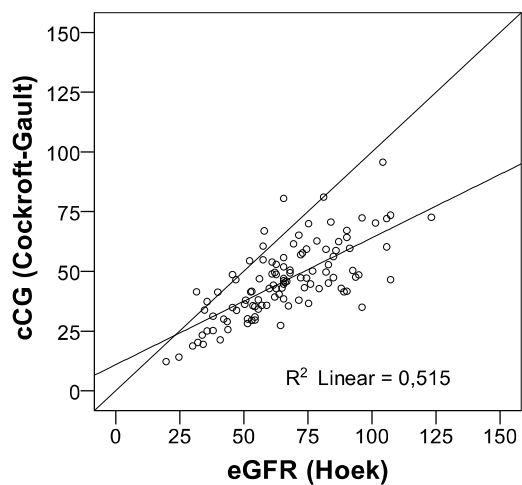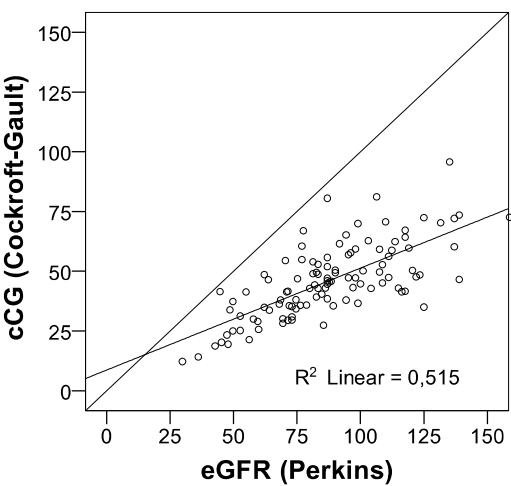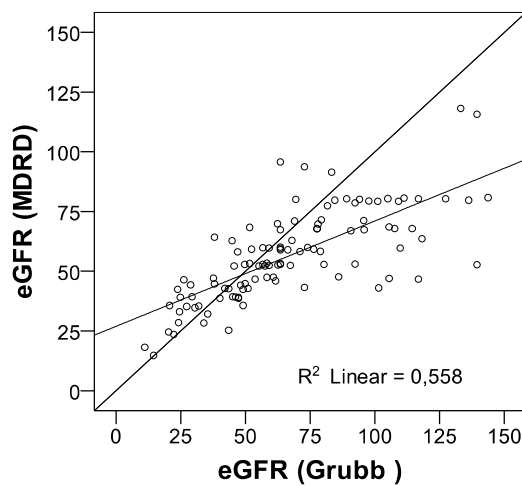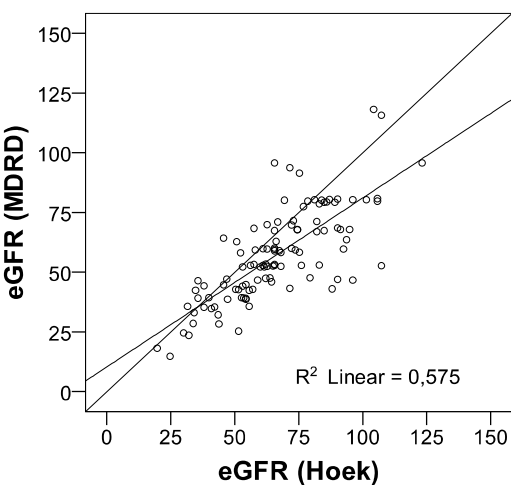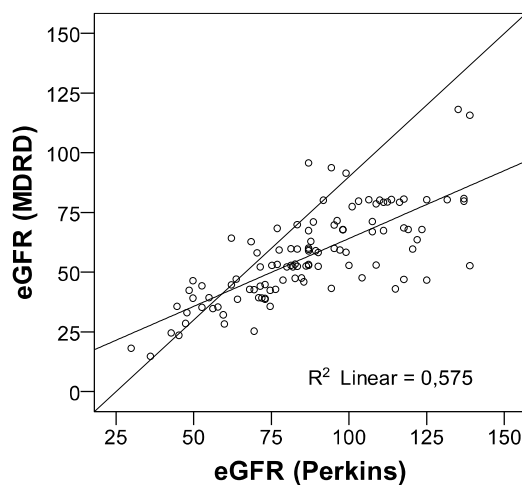

Supplement: MOESM1 [file 9440654]
